# Supplementary material for: Heterogeneity estimation in meta-analysis of standardized mean differences when the distribution of random effects departs from normal: A Monte Carlo simulation study
Source: Springer Nature journal article supplement (doi:10.1186/s12874-022-01809-0), 2023-01-17
Supplement: 12874_2022_1809_MOESM2_ESM.pdf [file 12874_2022_1809_MOESM2_ESM.pdf]

**Figure S2**

*Absolute bias of the frequentist estimators as a function of the average sample size of primary studies*

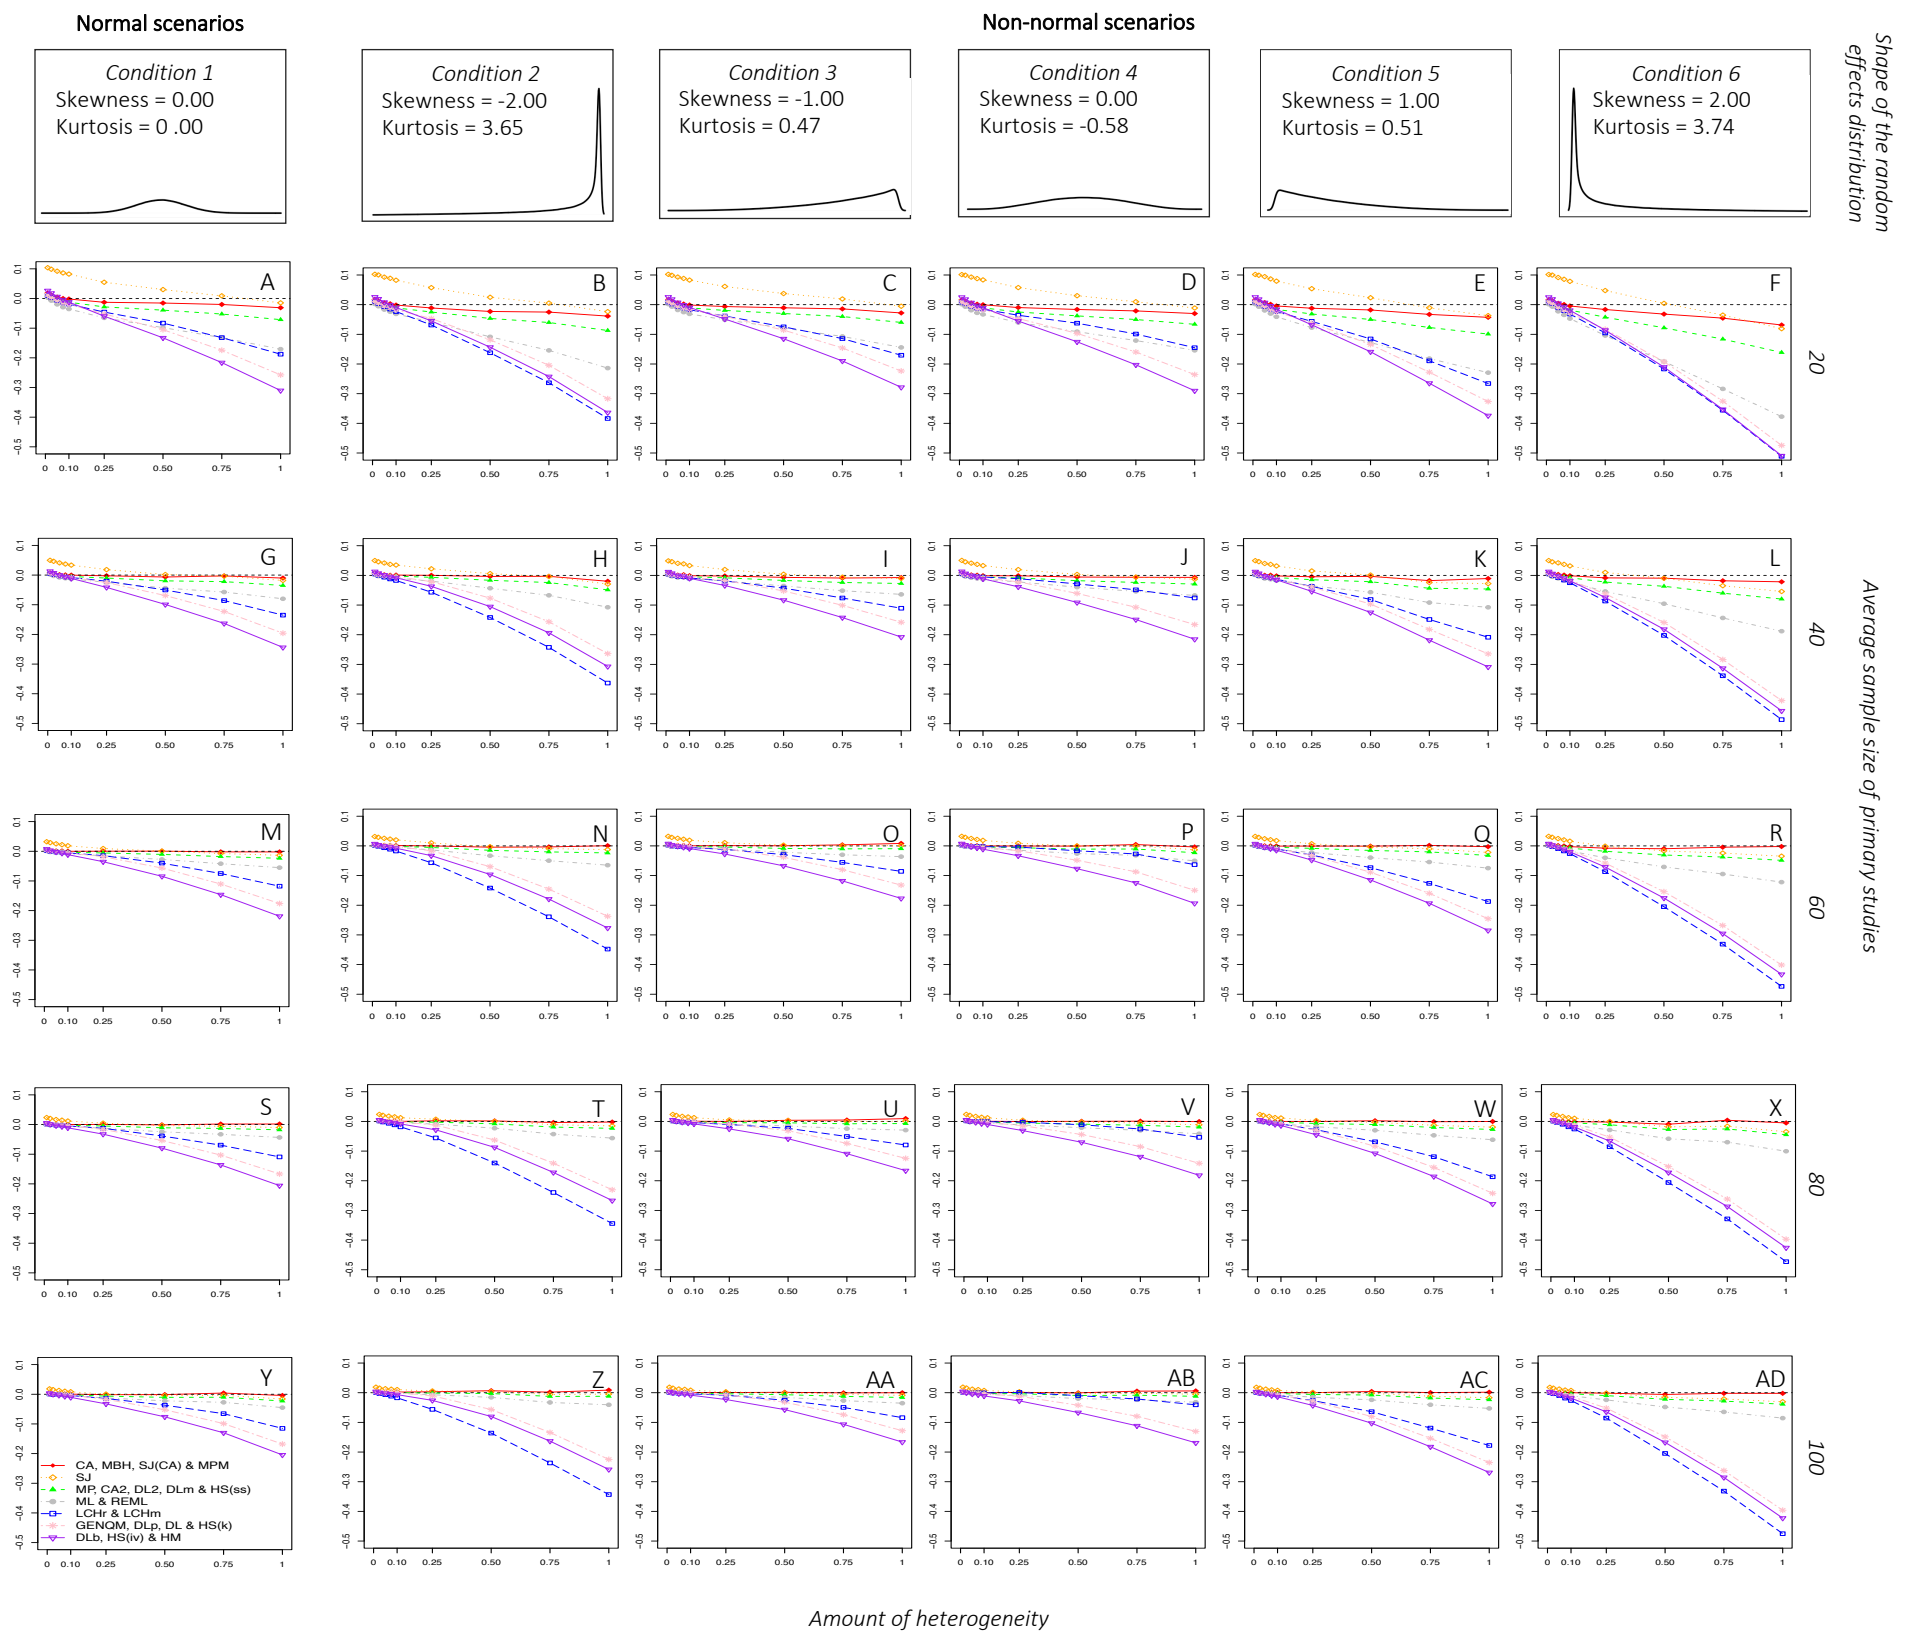

*Note.* Absolute bias of the frequentist estimators as a function of the average sample size of primary studies, the amount of heterogeneity and the shape of the random-effects distribution. CA = Cochran estimator; MBH = Malzahn-Böhning-Holling estimator; SJ(CA) = Sidik-Jonkman estimator with prior CA estimation; MPM = median-unbiased Mandel-Paule estimator; SJ = Sidik-Jonkman estimator; MP = Mandel-Paule estimator; CA2 = two-step Cochran estimator; DL2 = two-step DerSimonian-Laird estimator; DLm = multistep DerSimonian-Laird estimator; HS(ss) = Hunter-Schmidt estimator weighted by sample size; ML = maximum likelihood estimator; REML = restricted maximum likelihood estimator; LChr = Lin-Chu-Hodges  $r$  estimator; LChm = Lin-Chu-Hodges  $m$  estimator; GENQM = median-unbiased generalized  $Q$  statistic estimator; DLp = positive DerSimonian-Laird estimator; DL = DerSimonian-Laird estimator; HS(k) = Hunter-Schmidt estimator corrected by small sample size; DLb = nonparametric bootstrap DerSimonian-Laird estimator; HS(iv) = Hunter-Schmidt estimator weighted by inversed variance; HM = Hartung-Makambi estimator.
