# Supplementary material for: Heterogeneity estimation in meta-analysis of standardized mean differences when the distribution of random effects departs from normal: A Monte Carlo simulation study
Source: Springer Nature journal article supplement (doi:10.1186/s12874-022-01809-0), 2023-01-17
Supplement: 12874_2022_1809_MOESM11_ESM.pdf [file 12874_2022_1809_MOESM11_ESM.pdf]

**Figure S11**

*Absolute bias for the CA, DL and ML estimators according to some simulation conditions set for the study of Kromrey & Hogarty*

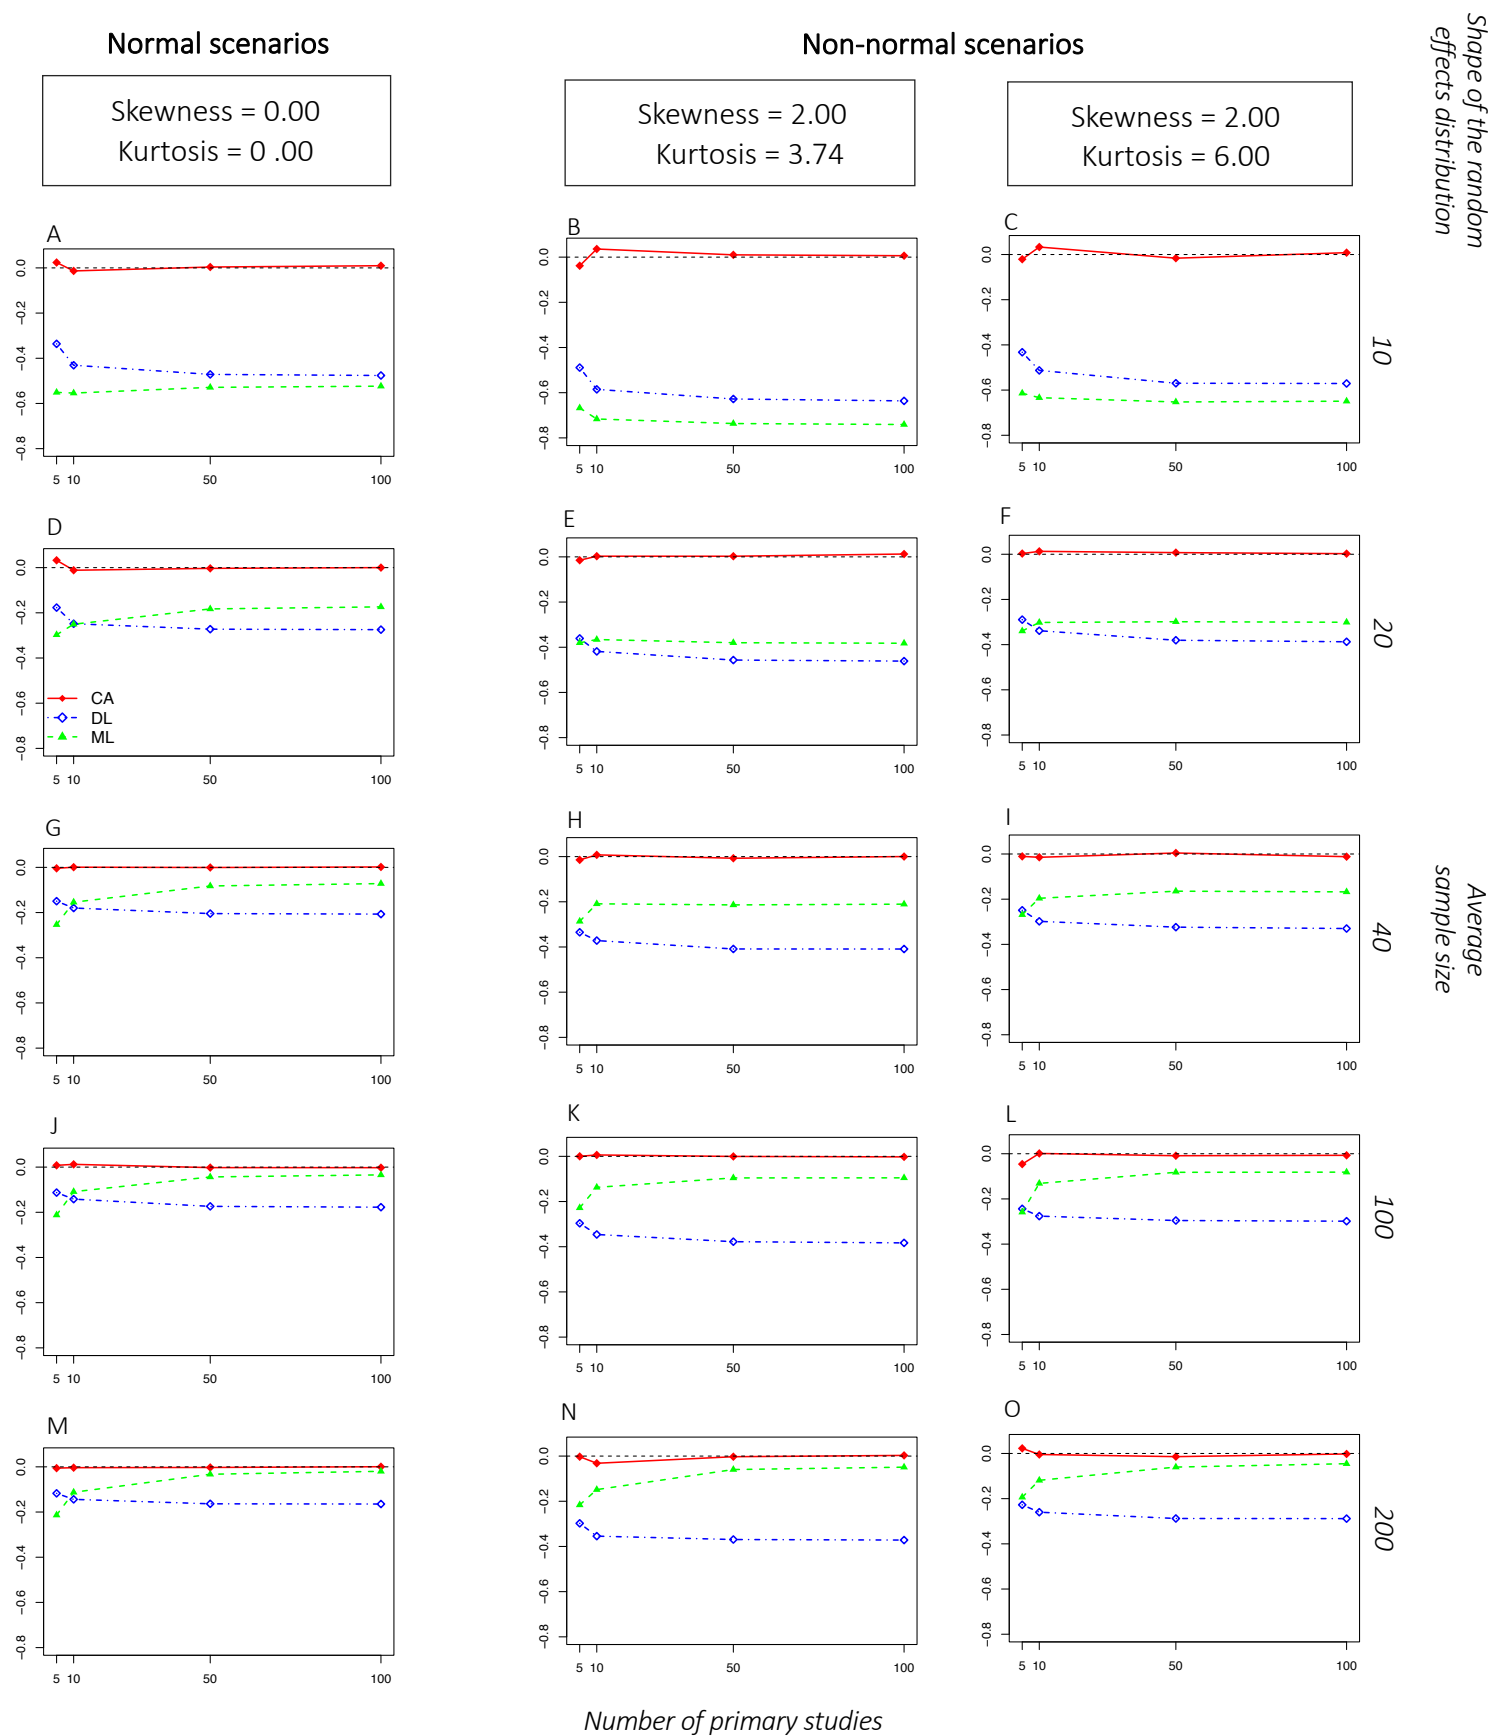

*Note.* Absolute bias of the CA, DL and ML estimators as a function of the number of primary studies and the average sample size. The results are presented separately for each condition of the shape of the random-effects distribution, where the overall effect ( $\mu_{\delta}$ ) and the between-study variance ( $\tau^2$ ) are set to 0.5 and 1, respectively. CA = Cochran estimator; DL = DerSimonian-Laird estimator; ML = maximum likelihood estimator.
